# Supplementary material for: Nutrient-Regulated Antisense and Intragenic RNAs Modulate a Signal Transduction Pathway in Yeast
Source: PLoS Biol. 2008 Dec 23;6(12):e326. doi: 10.1371/journal.pbio.0060326 (PMC2605928; doi:10.1371/journal.pbio.0060326)
Supplement: Table S6 — (48 KB XLS) [file pbio.0060326.st006.xls]

## Sheet: Sheet1
Supplementary Table S6. Primers used in this work.
Primer	Description
PHO4D-F	PHO4 disruption 5'	GGAGTGGAAACAGCAAAATGTGTCGGCCGCGCCGTCCAAAGCGACCACCGTGGAGGCGGCCTGCCGGTACATCCGTCACCTACAGCAGAACGTGAGCACGTCCCACCACCATCATCATCAC
PHO4D-R	PHO4 disruption 3'	CCTAATCTCGAAAACCCGGTGTGGGCCACTTTCCAGCAAAGCGCCTCTATAACAAGCACCGCGCAGGGGAGGCGCGCCCCAGTCCGATATGCCCGGAACACTATAGGGAGACCGGCAGATC
PHO4-Flag-F	Pho4-tag 5'	ATGGGCCGTACAACTTCTGAGGGAATACACGGTTTTGTGGACGATCTAGAGCCCAAGAGCAGCATTCTTGATAAAGTCGGAGACTTTATCACCGTAAACACGCCAACACCCGCTGACGCGCC
PHO4-Flag-R	Pho4-tag 3'	CTAATCTCGAAAACCCGGTGTGGGCCACTTTCCAGCAAAGCGCCTCTTATAACAAGCACCGCGCAGGGGAGGCGCGCCCCAGTCCGATATGCCCGGAACGTGCTTCCCATTGGTGCACGGACATTTCCCCGAAAAGTGCC
Rpo21-Flag-F	Rpo21-tag 5'	ACCTTCTTACTCCCCAACATCTCCAGGCTACAGCCCAGGATCTCCTGCATATTCTCCAAAGCAAGACGAACAAAAGCATAATGAAAATGAAAATTCCAGATCCCACCACCATCATCATCAC
Rpo21-Flag-R	Rpo21-tag 3'	TAAATTAGTTACTTGATTCCCTATCCCTACCATAATGCTATGAAAAATAATGGTATATTTGGTATACGTTTTTATTATGATACAAAAATAAACTAGAAATACTATAGGGAGACCGGCAGATC
MN344	Kl URA3 internal primer-5'	CTCTTGACGTTCGTTCGACTGATGAGC
MN345	Kl URA3 internal primer-3'	CTGAGCAATGAACCCAATAACGAAATC
MN464	Forward tag + KlURA3-5'	GGAATTCCAGCTGACCACCGGGTTCTCGAGAGCTCG
MN465	Reverse tag + KlURA3-3'	GATCCCCGGGAATTGCCATGGAGATCCCAATACAACAGATC
MN468	PHO8 probe 5'	GTGCCAGCTGCACCCAAACAT
MN469	PHO8 probe 3'	ATGTTTGGGTGCAGCTGGCAC
MN541	KCS1 ChIP primer 5'	GCGAGGCATTCTGTCAAAGAGCACATTTGG
MN542	KCS1 ChIP primer 3'	GGCGCGAAGTTGAGGGGCCGGCGACAC
MN573	PHO8 ChIP primer-5'	GAGGGCCATGCTTTCGAGTGGAACTGC
MN574	PHO8 ChIP primer-3'	CGCGTTCAAATAATGTCCCGTATGCTG
MN613	CDC19 ChIP primer-5'	GATCGTCGGTTGTGATACGGTCAGGG
MN614	CDC19 ChIP primer-3'	GGTTCTTCTCAAGTCAGAACCAGCAAC
MN615	CDC19 probe -5	GCTGGTAGAATCATCTACGTTGATGA
MN616	CDC19 probe -3	GTGGTACCGGAAGTGGACAAGAC
MN725	MNN1 ChIP primer-5'	GATAGCGTAGTAAGGCTTATCTAGA
MN726	MNN1 ChIP primer-3'	GAGAGTACGAAGCAAGACCAGGACA
MN738	KCS1 5'-RACE primer antisense-1	GGAAGTGTCGCTATACCAGAGGCAC
MN768	CBF1 probe 5'	GCCCCACTCCGCTCCCTGCAAAGGC
MN769	CBF1 probe 3'	GGCCTCGCTGTAGTTCTGCTCCTCG
MN770	CBF1 ChIP primer-5'	GAGGTCAAGAACGGCGACAAGGACAAAG
MN771	CBF1 ChIP primer-3'	GGCCTCGCTGTAGTTCTGCTCCTCGT
MN789	ATO3 probe -5	GACATCGTCTGCTTCTTCTCCACAGGA
MN790	ATO3 probe -3	GGCATTGTGTGCGCCCTGAAGGCTA
MN803	CIS3 probe -5	GCCTCCGTTGCTGCTCTATCCGCCACTG
MN804	CIS3 probe -3	GAATGGCACTACATTGTTCGGCGACG
MN813	ARO9 probe 5'	GATGAGACGGAGTCTAACTGGGATGTC
MN814	ARO9 probe 3'	GCTTCAATCAACTGATCATCATCCCTTGC
MN827	CIS3 ChIP primer-5'	ACCTCTAGTAGTTCGGGAATCGAGGC
MN828	CIS3 ChIP primer-3'	GGTGGACCATGGTTCACCTGGAGTGT
MN831	ARO9 ChIP primer 5'	GTTGATCCACTGAGAGATTGTGACTGCG
MN832	ARO9 ChIP primer 3'	GGCAGAACCAGCAGTCATTGAGTCGATG
MN866	KCS1 ChIP primer within ORF 5'	GATACATTAAGAGAGCAGCAGCAGCA
MN867	KCS1 ChIP primer within ORF 3' and 5'-RACE primer antisense-2	GAGGCACAATTTATGGTGGCAGGCTG
MN898	AIR2 5' primer	GGAATTCCAGCTGACCACCGTCGTCGATACGGCACCCACAACTCCTCC
MN899	AIR2 3' primer	GATCCCCGGGAATTGCCATGCCCAAGGTACCACTCCTATATGGTTG
MN908	KCS1 5'-RACE primer sense-1	GAGTCGGAAGGGTGCATAACAACATTG
MN909	KCS1 5'-RACE primer sense-2	GTCTTACATGGCAGAAAGGCGAGTAC
MN910	KCS1 ChIP primer 3'	GGCGCAAATGCTGCTGCTGCTCTC
MN910	KCS1 5'-RACE primer antisense-1	GGCGCAAATGCTGCTGCTGCTCTC
MN911	KCS1 5'-RACE primer antisense-2	CATGAATTTCGTGAGAGGTATC
MN914	KCS1 ChIP primer within ORF 3'	GCAATTCATGCCGCGGTATATTGGTGTCC
MN929	ASN1 promoter mutation-sense	GCCGCCCGTGTTCGTGCAAGCTTAGCGCAAATACGCCTGGG
MN930	ASN1 promoter mutation-antisense	CCCAGGCGTATTTGCGCTAAGCTTGCACGAACACGGGCGGC
MN952	KCS1 Pho4 binding site 1 mutation-sense	GGCAATTAAGCCCAATAAACATGTAGCGCATAGAAATAATATTAC
MN953	KCS1 Pho4 binding site 1 mutation-antisense	GTAATATTATTTCTATGCGCTACATGTTTATTGGGCTTAATTGCC
MN974	oJW102	GCGGTGACCCGGGAGATCTGAATTC
MN975	oJW103	GAATTCAGATC
MN1000	ASN1 promoter-5'	GCGAAACACTCGGATCCTATATTTTACCA
MN1001	ASN1 promoter-3	GTGCCTGAAAGCGGCAGATCTACCACACATCTTAAGTTAC
MN1027	MNN1 probe -5'	GGACACTGTATACGCTAGACGATGAATG
MN1028	MNN1 probe -3'	GAAGTCACCTCGCCACTTAGGGTGGATG
MN1029	YPS3 probe -5'	GCTGGAAGCAAAGTTTGCTCTCAGA
MN1030	YPS3 probe -3'	GGCGTCCAGCCTTCGACCACACAAG
MN1031	YPS3 ChIP primer-5'	GGCGACAATGGTGAACTCAGCAAGAG
MN1032	YPS3 ChIP primer-3'	GTGACATCGAACGCCACCGGGTGCT
MN1033	PTK2 probe -5'	GACAAGGGCTGCCACAAGCCGGGTCC
MN1034	PTK2 probe -3'	GGATGACACGCTTGGACTTCCGAG
MN1035	PTK2 ChIP primer-5'	GTTGAATACGATATCCAGTTCACAGAC
MN1036	PTK2 ChIP primer-3'	GCTACGGCTTACACAACTTTACTTTCC
MN1037	PST1 probe -5	GACACTTCGTTACAATCTGTCGATGG
MN1038	PST1 probe -3'	GGTGCCATGATAGCGGCATTGCCT
MN1039	PST1ChIP primer-5'	GACGATGCTGCACGTGGTTAGT
MN1040	PST1 ChIP primer-3'	GAGCGCAGTTGAAGCGATAAGTG
MN1134	KCS1 ORF cloning 5' and AS primer for 5'-RACE	CTAAAGCTAAAAGACCATGGATACCTCTCA
MN1135	KCS1 ORF cloning 3'	TCAATCACTAACTCGAGCATCGTCATTGT
MN1136	KCS1 Pho4 binding site 2 mutation-sense	GCAATTCATGCCGCGGTATATTGGTGTCC
MN1137	KCS1 Pho4 binding site 2 mutation-antisense	GGACACCAATATACCGCGGCATGAATTGC
MN1138	KCS1 Pho4 binding site 3 mutation-sense	GTCTGTCCATCCACATGTCAAAAGATCAC
MN1139	KCS1 Pho4 binding site 3 mutation-antisense	GTGATCTTTTGACATGTGGATGGACAGAC
MN1141	VIP1 5' primer	GCCACCTCCCGGAATTCAAGATGATCAC
MN1142	VIP1 3' primer	GTAGATGATGAAGATCTGGACGAGGCAGG
MN1144	IR tag + VIP1-5'	GCAGGGATGCGGCCGCTGACGGGAGGTGTTGGAACGTTGTAGGCTT
MN1145	IF tag + VIP1-3'	CCGCTGCTAGGCGCGCCGTGGATGAGCCACGCTTTATGCAGTTG
MN1190	KCS1 primer for 5'-RACE	GGATGGACAGACTCAATTTCAGGATG
MN1191	KCS1 5'-RACE primer sense-1	GAACAAGATAAAGAAGGCGAGCAAG
MN1192	KCS1 5'-RACE primer sense-2	GGACGAAGAAGAGGATGAAGGTG
MN1195	RRP6 5' primer	GTGGTGAGAGCAGCATCATCGTTAG
MN1196	Reverse tag + RRP6-5'	GATCCCCGGGAATTGCCATGGATGGGGGTAGTGACTGGGG
MN1197	Forward tag + RRP6-3'	GGAATTCCAGCTGACCACCGACCCATCATCTAGCGATAGT
MN1198	RRP6 3' primer	GGTTCCCCACTGGCCTAAACGG
MN1201	dKcs1 cloning	GAAGAAAAGGATACCATGGAAAATGATA
MN1204	KCS1 Sense primer for dsRNA detection	GGACCCGCCATTATTGCTATC
MN1206	KCS1 AS primer for dsRNA detection	CTAAAGCTAAAAGACTATGGA
MN1208	KCS1 Sense* primer for dsRNA detection	GCGCCACGTGTTTATTGGGCT
MN1209	KCS1 AS* primer for dsRNA detection	GTACATCTTTCTGTCTTCTC
